# Supplementary material for: Genetic legacy of southern Middle Siberian mountain and foothill populations of Scots pine (Pinus sylvestris L.): Diversity and differentiation
Source: Frontiers journal article supplement (doi:10.3389/ffgc.2023.1152850), 2023-04-14
Supplement: Table_1.docx [file Table_1.docx]

Supplementary Material

Table S1. Bioclimatic variables downloaded from WorldClim (<http://www.worldclim.org/>) and used in MMRR (Multiple Matrix Regression with Randomization) analysis.

| **Variable** | **Description** |
| --- | --- |
| Bio 1 | Annual Mean Temperature |
| Bio 2 | Mean Diurnal Range (Mean of monthly (max temp - min temp)) |
| Bio 3 | Isothermality (Bio 2/Bio 7) (* 100) |
| Bio 4 | Temperature Seasonality (standard deviation *100) |
| Bio 5 | Max Temperature of Warmest Month |
| Bio 6 | Min Temperature of Coldest Month |
| Bio 7 | Temperature Annual Range (BIO5-BIO6) |
| Bio 8 | Mean Temperature of Wettest Quarter |
| Bio 9 | Mean Temperature of Driest Quarter |
| Bio 10 | Mean Temperature of Warmest Quarter |
| Bio 11 | Mean Temperature of Coldest Quarter |
| Bio 12 | Annual Precipitation |
| Bio 13 | Precipitation of Wettest Month |
| Bio 14 | Precipitation of Driest Month |
| Bio 15 | Precipitation Seasonality (Coefficient of Variation) |
| Bio 16 | Precipitation of Wettest Quarter |
| Bio 17 | Precipitation of Driest Quarter |
| Bio 18 | Precipitation of Warmest Quarter |
| Bio 19 | Precipitation of Coldest Quarter |
